# Supplementary material for: Sulfur-containing polymers from terpolymerization of active methylene compounds, carbon disulfide, and dihalohydrocarbons: synthesis and properties
Source: Royal Society of Chemistry journal article supplement (doi:10.1039/c9py01121h), 2019-01-01

## Supporting Information

### **Sulfur-Containing Polymers from Terpolymerization of Active Methylene Compounds, Carbon Disulfide, and Dihalohydrocarbons: Synthesis and Properties**

Chen Zhao, Xianghe Meng, Rou Lu, Haiming Xie,\* and Jun Liu\*

National & Local United Engineering Laboratory for Power Battery, Department of Chemistry, Northeast Normal University, Changchun, 130024 (China)

#### **Table of contents**

|                                                                                                                  |    |
|------------------------------------------------------------------------------------------------------------------|----|
| 1. General information .....                                                                                     | S2 |
| 2. Synthetic procedure of model compound <b>3</b> .....                                                          | S2 |
| 3. Copies of <sup>1</sup> H NMR and <sup>13</sup> C NMR spectra of compounds <b>3</b> and <b>PKDTA I–V</b> ..... | S3 |

## 1. General information

All of the reagents and solvents were used without further purification. All the reactions were carried out in air.  $^1\text{H}$  NMR and  $^{13}\text{C}$  NMR spectra were recorded at 25 °C on a Varian 500 MHz and 125 MHz, respectively. Their peak frequencies were referenced versus an internal standard (TMS) shifts at 0 ppm for  $^1\text{H}$  NMR and against the solvent,  $\text{CDCl}_3$  at 77.4 ppm for  $^{13}\text{C}$  NMR, respectively. Molecular weights and molecular weight distributions of the resultant copolymers were determined with a PL-GPC220 chromatograph equipped with an HP 1100 pump from Agilent Technologies. The GPC columns were eluted with THF with 1.0 mL/min at 40 °C. The sample concentration was 0.4 wt %, and the injection volume was 100  $\mu\text{L}$ . Calibration was performed using monodisperse polystyrene standards covering the molecular-weight range from 580 to 460 000 Da. Infrared spectra were recorded by using a Bruker Vector 22 FT-IR spectrophotometer. Thermogravimetric analysis (TGA) was carried out on a Perkin-Elmer Pyris I instrument under a  $\text{N}_2$  atmosphere at a heating rate of 10 °C/min from room temperature to 400 °C. Samples for thermal analyses were all purified. The refractive index of the copolymer film was measured on an AUDEL-III autolaser ellipsometer equipped with a He-Ne laser ( $\lambda = 632.8 \text{ nm}$ ).

## 2. Synthetic procedures of compounds 3

Model compound **3** was synthesized by following previously reported procedures.<sup>1-2</sup>

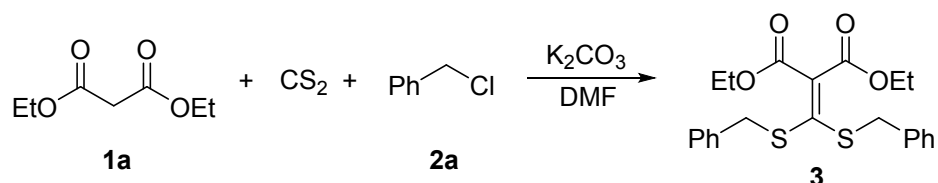

To a solution of diethyl malonate **1a** (10 mmol) in DMF (50 mL),  $\text{K}_2\text{CO}_3$  (22 mmol) was added. After stirring at room temperature for 30 min, the reaction mixture was cooled to 0 °C, then  $\text{CS}_2$  (12 mmol) was added. After stirring at 0 °C for 1.0 h, (chloromethyl)benzene (22 mmol) was added. Then the resulting mixture was stirred overnight at room temperature. The resulting mixture was poured into ice-water and extracted with  $\text{CH}_2\text{Cl}_2$  ( $3 \times 30 \text{ mL}$ ). The combined organic extracts were washed with  $\text{H}_2\text{O}$  ( $3 \times 30 \text{ mL}$ ), dried ( $\text{Mg}_2\text{CO}_3$ ), filtered, and concentrated in vacuo to give a yellow oil. Purification was carried out by flash chromatography (silica gel, acetone-EtOAc, 1:4) to afford the product **3** as a yellowish oil; yield: 85%.

References:

- (1) Dong, Y.; Wang, M.; Liu, J.; Ma, W.; Liu, Q. *Chem. Commun.* **2011**, 47, 7380–7382.
- (2) Wang, M.; Ai, L.; Zhang, J. Y.; Liu, Q.; Gao, L. X. *Chin. J. Chem.* **2002**, 20, 1591–1597.

### 3. Copies of $^1\text{H}$ NMR and $^{13}\text{C}$ NMR spectra of compounds 3 and PKDTA I–V

#### $^1\text{H}$ NMR (600 MHz, $\text{CDCl}_3$ ) for 3

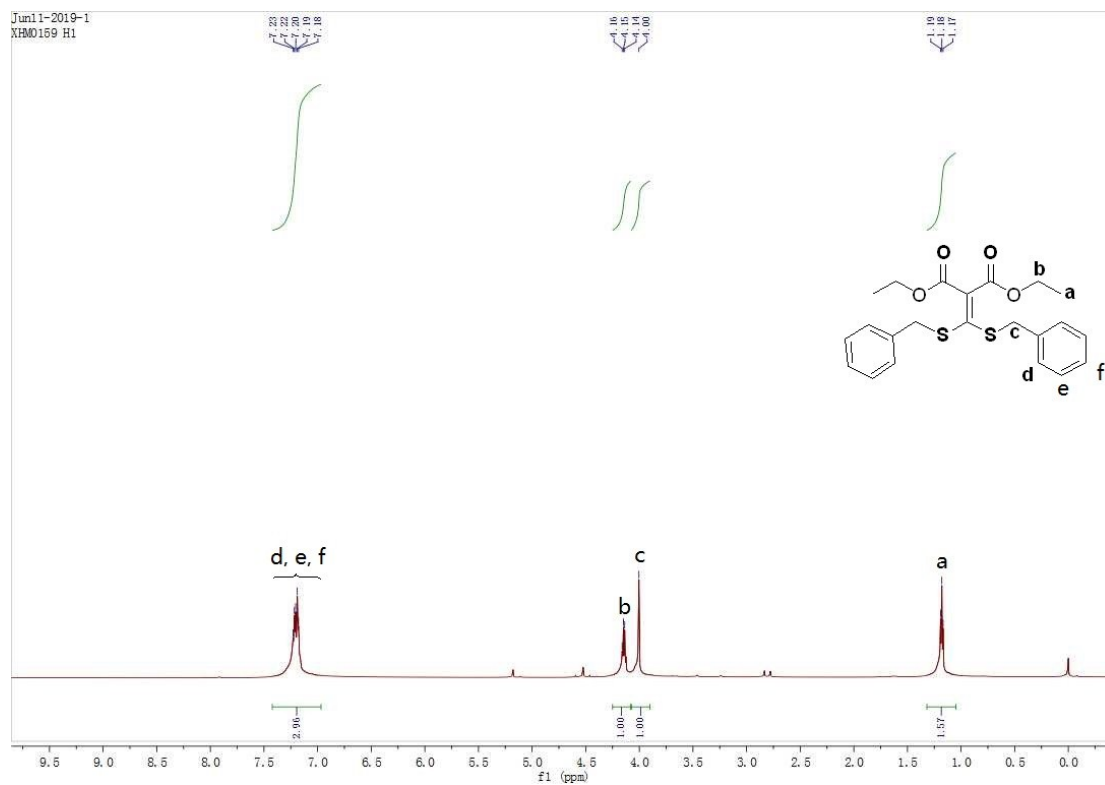

#### $^{13}\text{C}$ NMR (151 MHz, $\text{CDCl}_3$ ) for 3

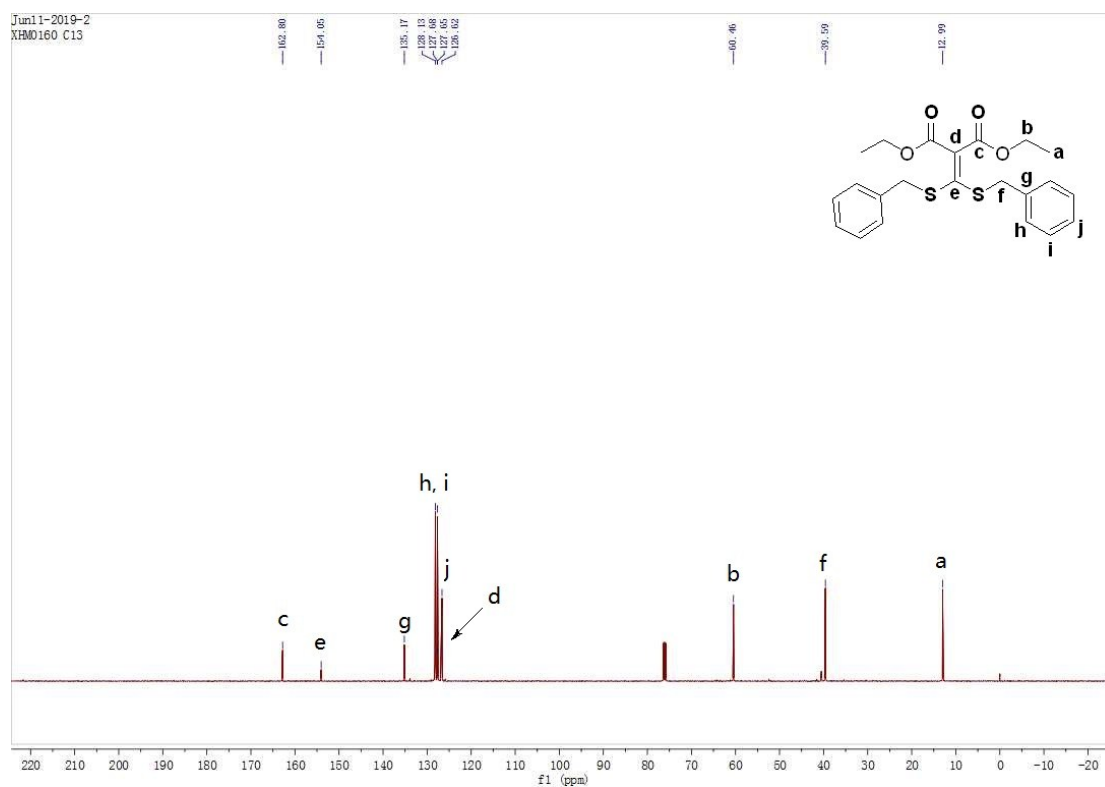

### <sup>1</sup>H NMR (600 MHz, CDCl<sub>3</sub>) for PKDTA I

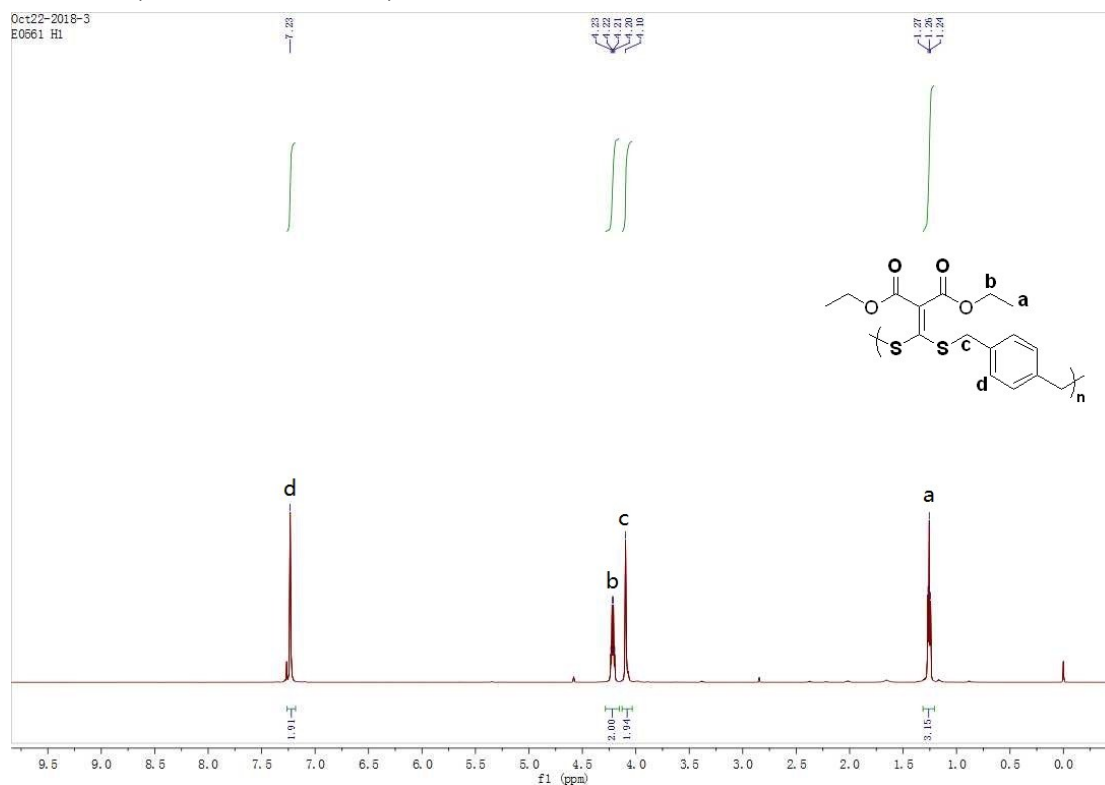

### <sup>13</sup>C NMR (151 MHz, CDCl<sub>3</sub>) for PKDTA I

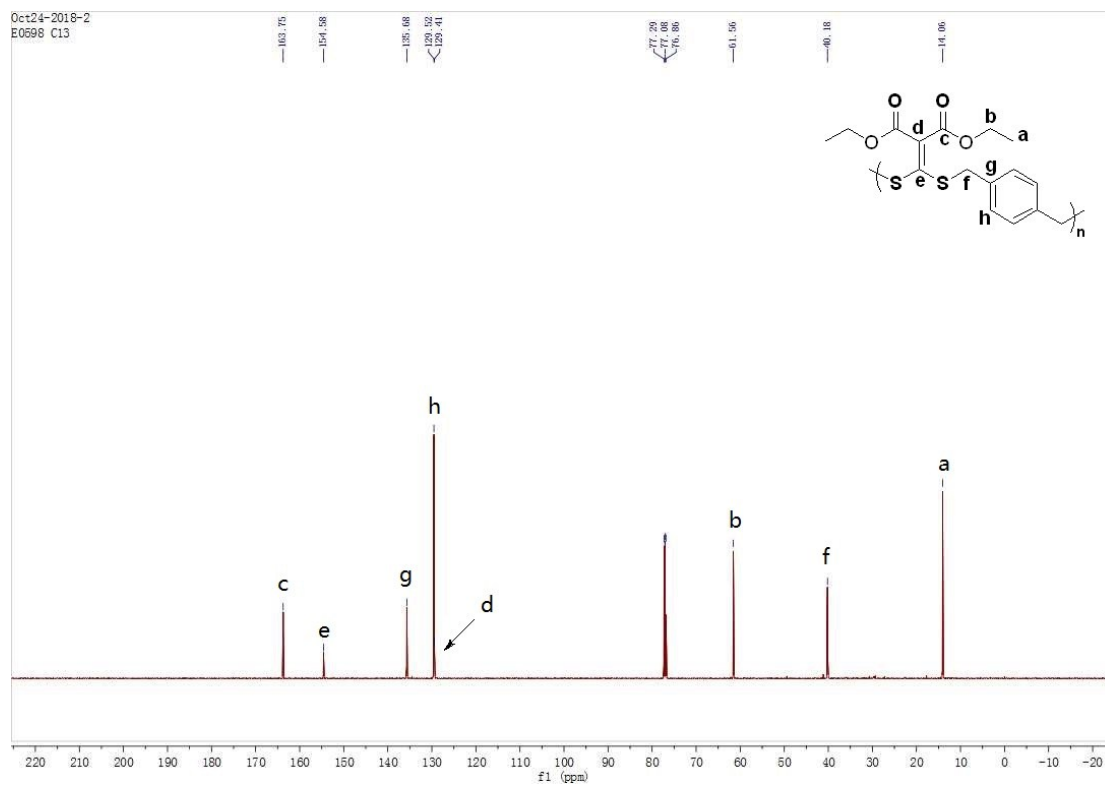

### $^1\text{H}$ NMR (600 MHz, $\text{CDCl}_3$ ) for PKDTA II

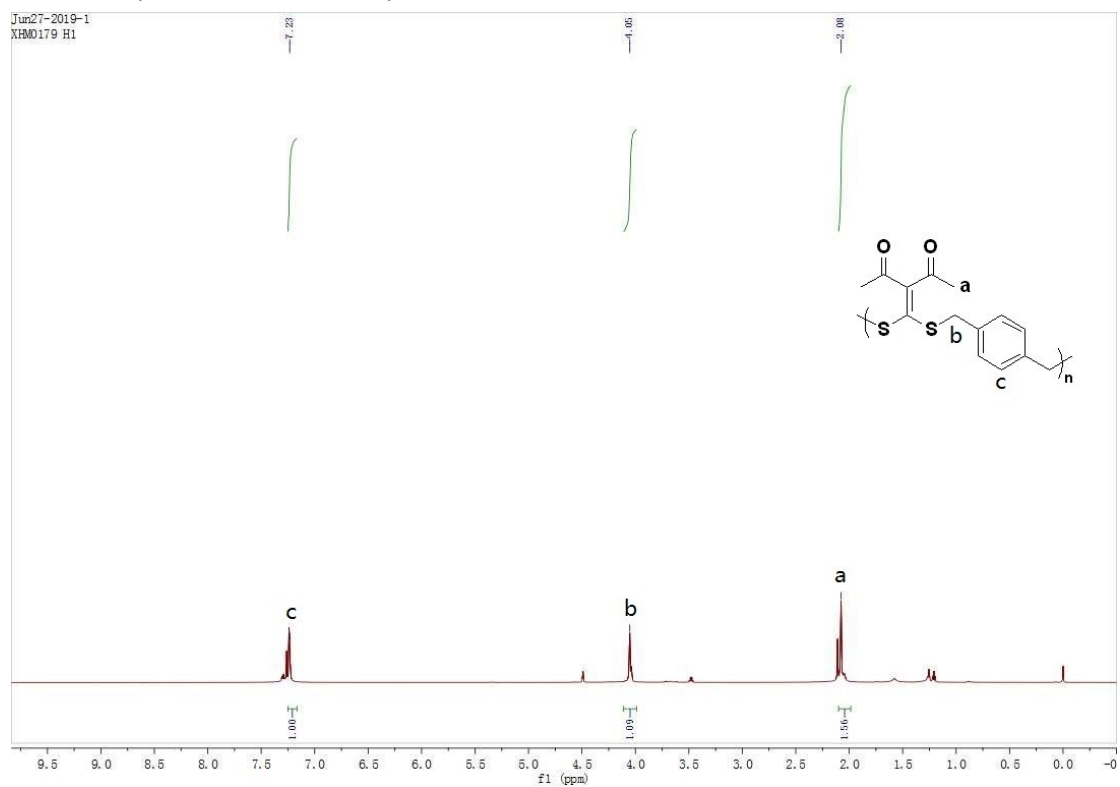

### $^{13}\text{C}$ NMR (151 MHz, $\text{CDCl}_3$ ) for PKDTA II

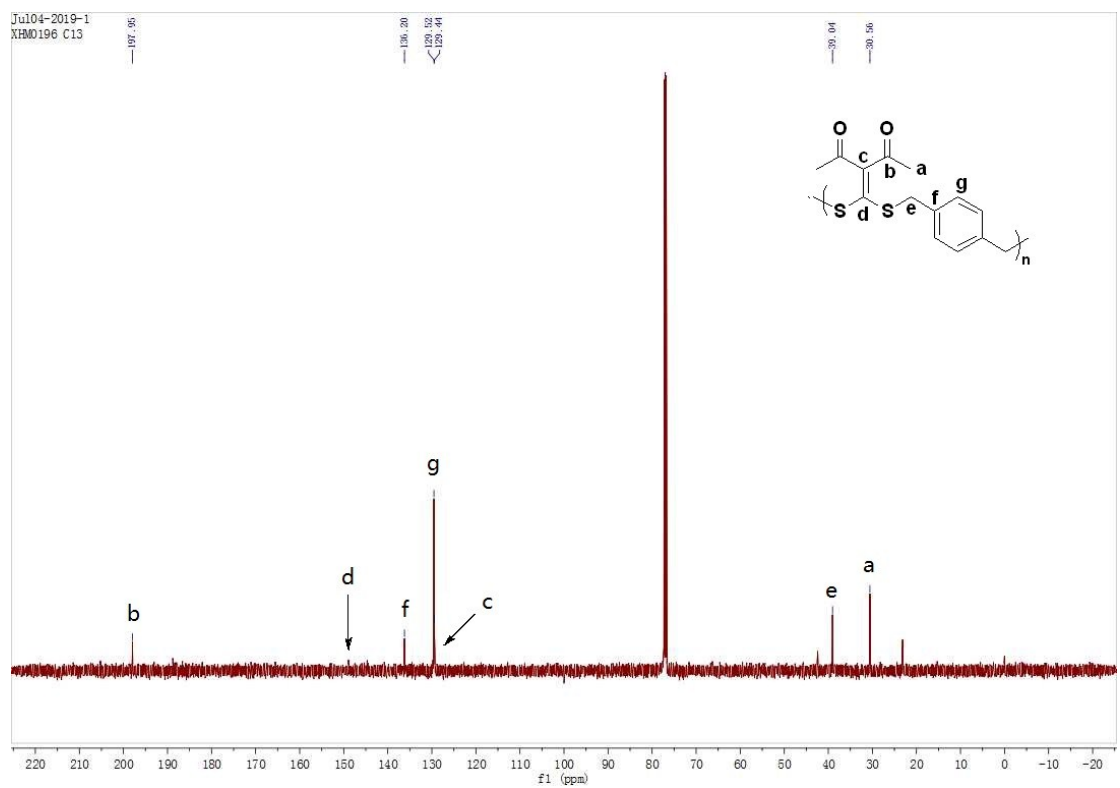

### <sup>1</sup>H NMR (600 MHz, CDCl<sub>3</sub>) for PKDTA III

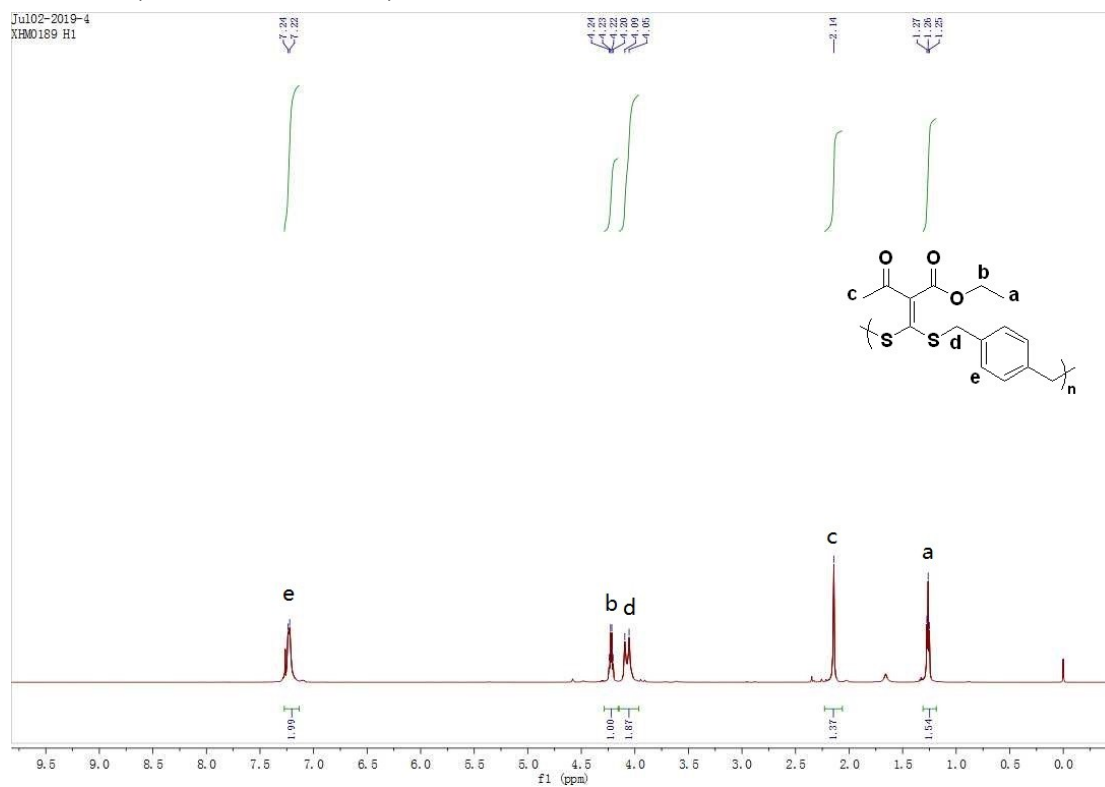

### <sup>13</sup>C NMR (151 MHz, CDCl<sub>3</sub>) for PKDTA III

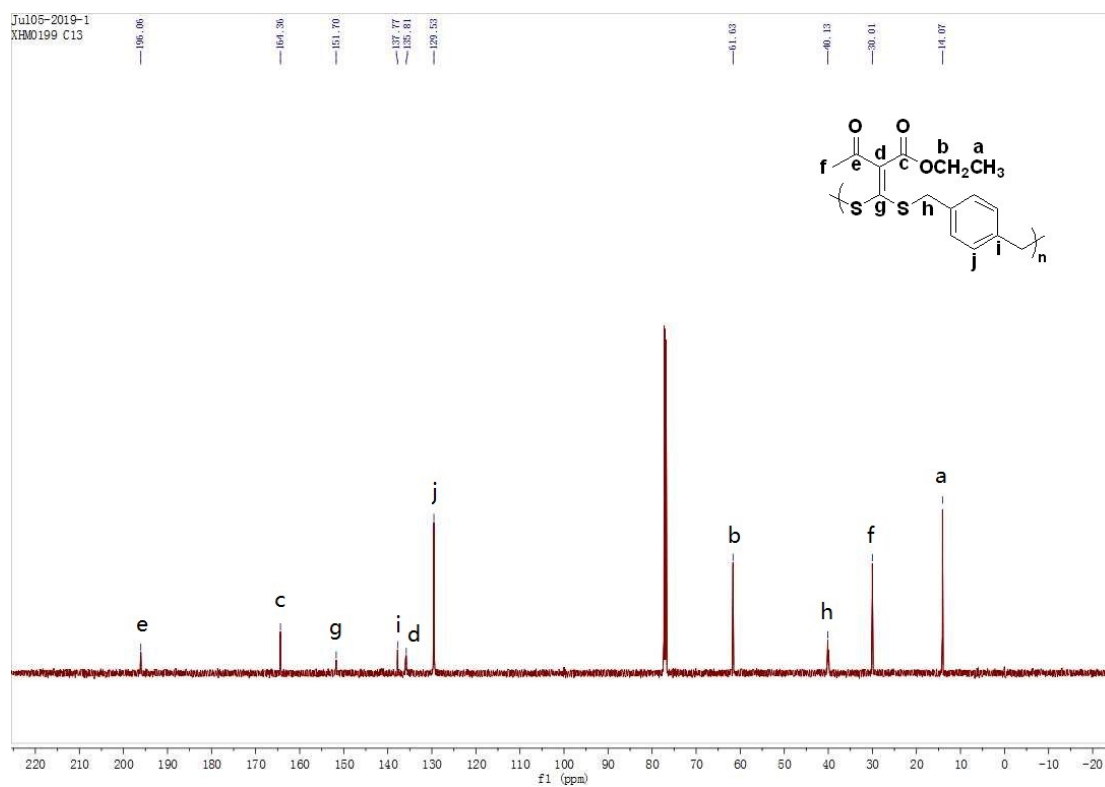

### $^1\text{H}$ NMR (600 MHz, $\text{DMSO-}d_6$ ) for PKDTA IV

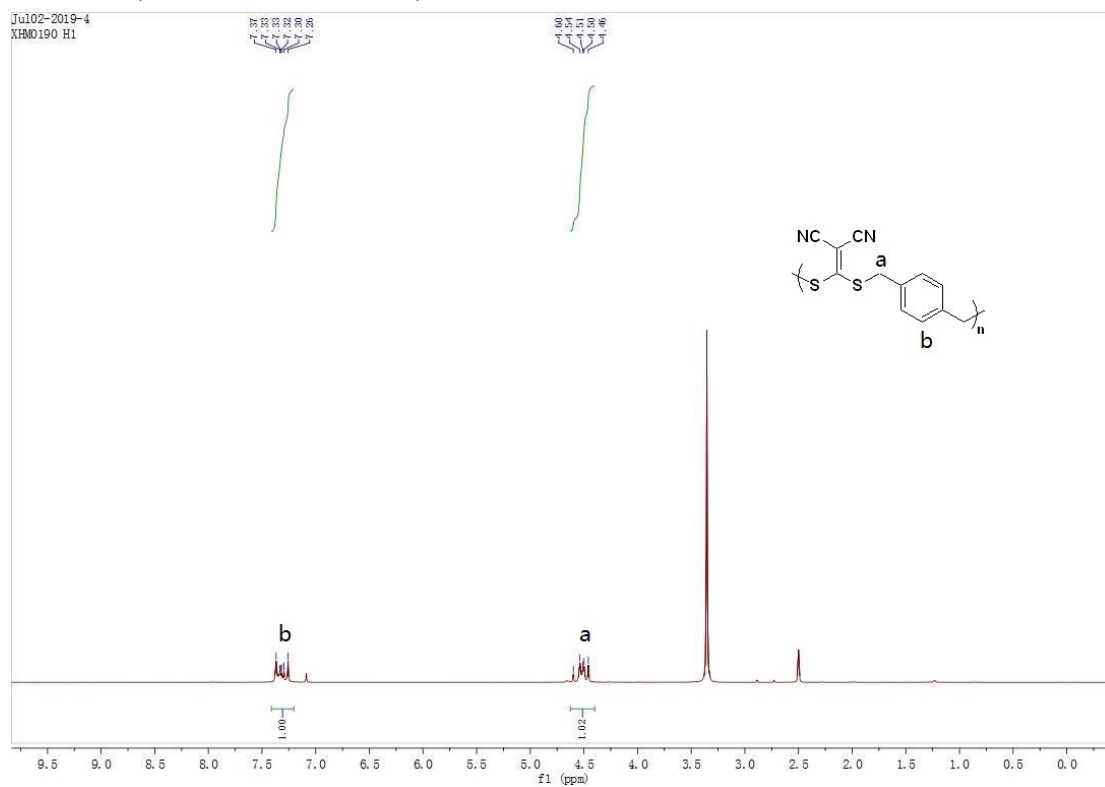

### $^{13}\text{C}$ NMR (151 MHz, $\text{DMSO-}d_6$ ) for PKDTA IV

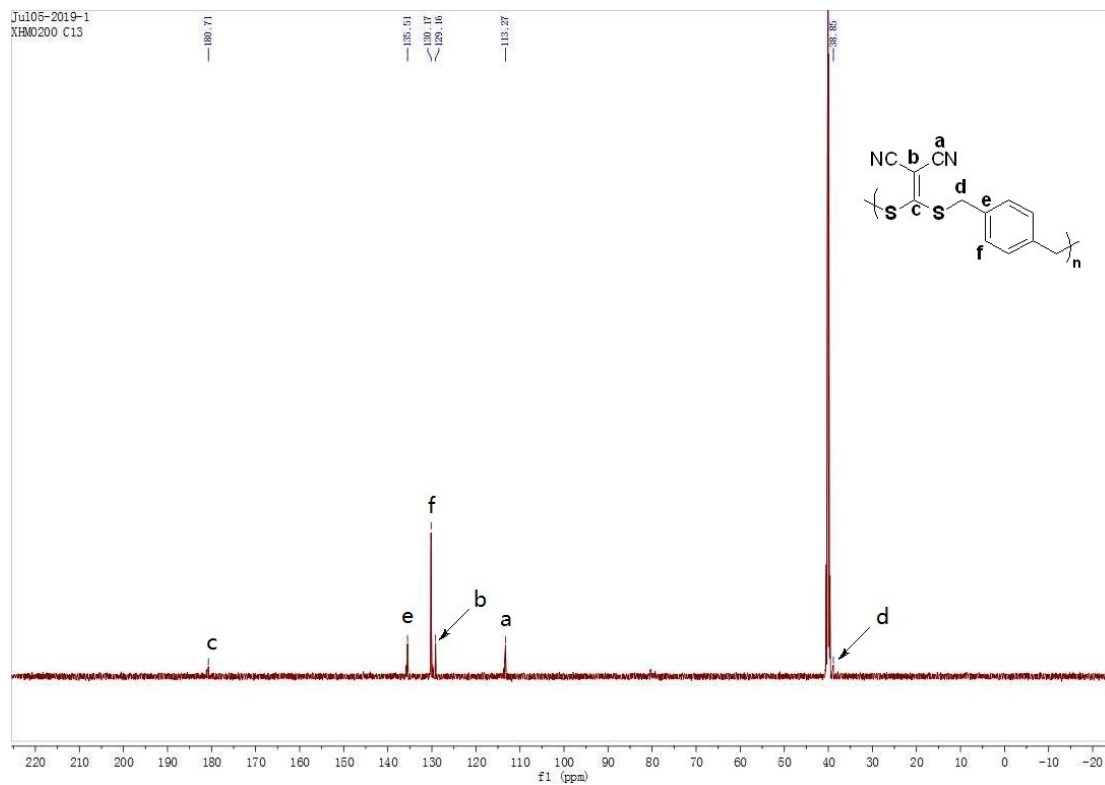

### $^1\text{H}$ NMR (600 MHz, $\text{DMSO-}d_6$ ) for PKDTA V

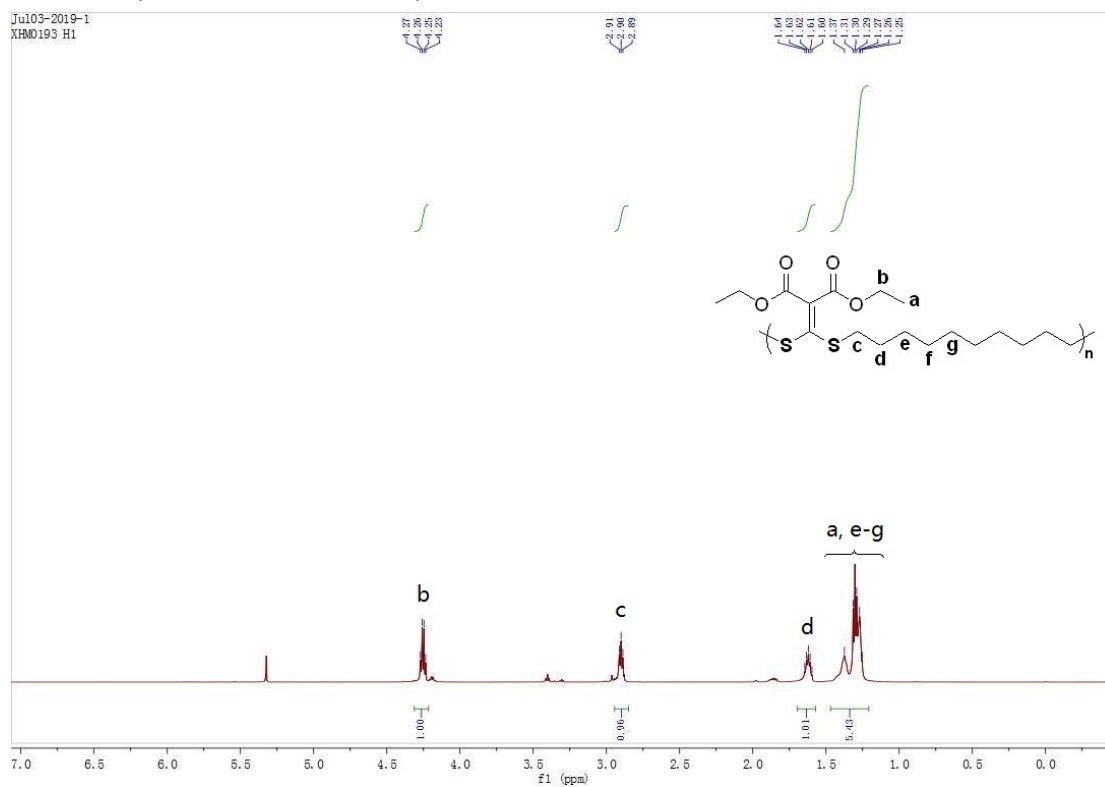

### $^{13}\text{C}$ NMR (151 MHz, $\text{CDCl}_3$ ) for PKDTA V

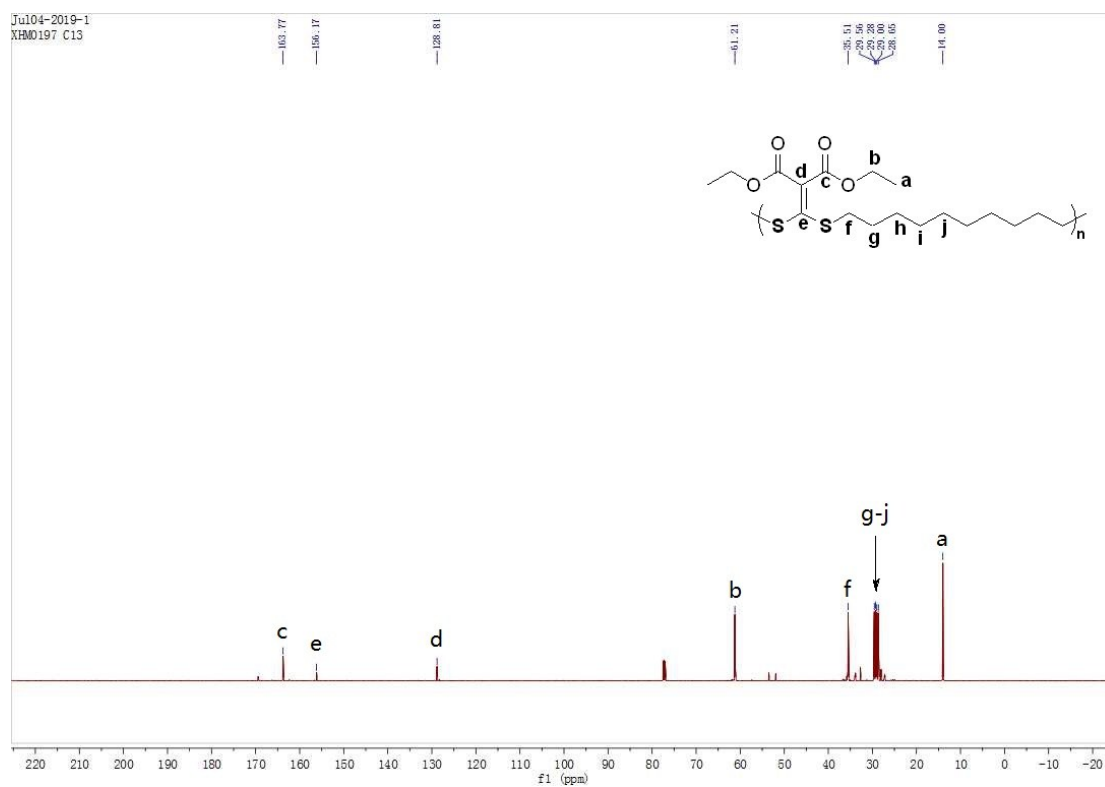

Supplement: c9py01121h1.pdf [file c9py01121h1.pdf]
